# Supplementary material
Source: MDPI journal article supplement (https://www.mdpi.com/2079-6412/12/12/1805)
Supplement: s1 [file s1]

# Supplementary Materials: In Situ Deposition of Reduced Graphene Oxide on Ti Foil by a Facile, Microwave-Assisted Hydrothermal Method

Carmen Lazau <sup>1</sup>, Mircea Nicolaescu <sup>1,2</sup>, Corina Orha <sup>1</sup>, Anielsa Pop <sup>2</sup>, Simona Căprărescu <sup>3</sup>, Cornelia Bandas <sup>1,\*</sup>

<sup>1</sup> National Institute for Research and Development in Electrochemistry and Condensed Matter Timisoara, Dr. A.P. Podeanu No. 144, 300569 Timisoara, Romania

<sup>2</sup> Department of Applied Chemistry and Engineering of Inorganic Compounds and Environment, University "Politehnica" of Timisoara, P-ta Victoriei No. 2, 300006 Timisoara, Romania

<sup>3</sup> Department of Inorganic Chemistry, Physical Chemistry and Electrochemistry, Faculty of Chemical Engineering and Biotechnologies, University "Politehnica" of Bucharest, Polizu Street No. 1-7, 011061 Bucharest, Romania

\* Correspondence: cornelia.bandas@gmail.com

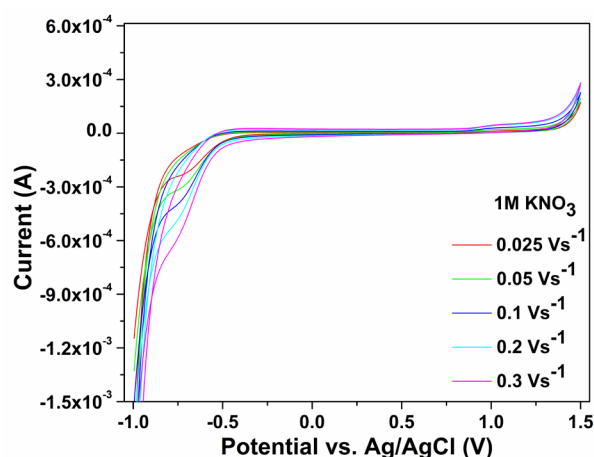

(a)

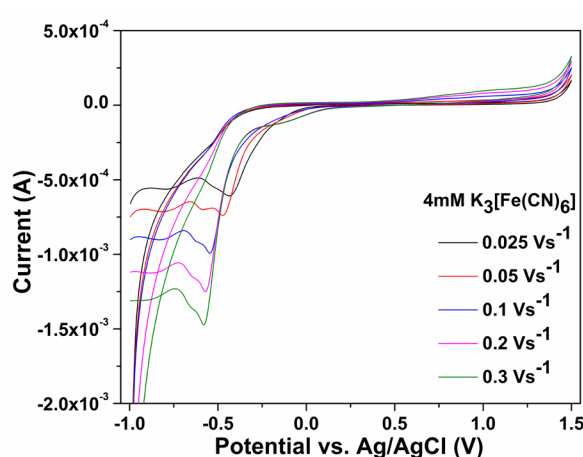

(b)

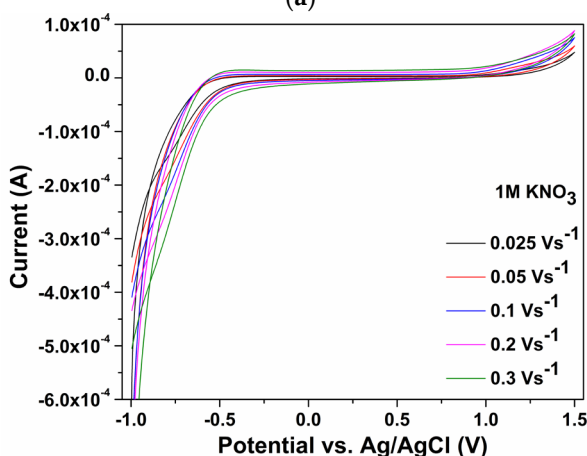

(c)

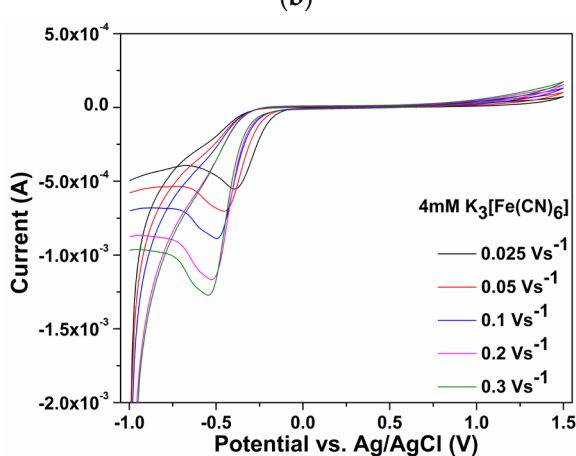

(d)

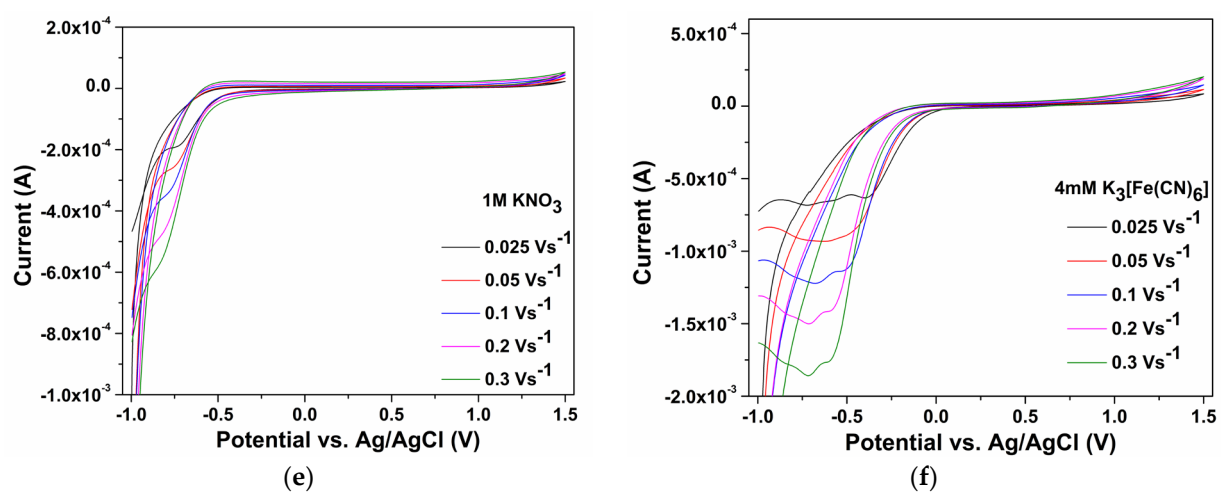

**Figure S1.** Cyclic voltammograms recorded in 1M KNO<sub>3</sub> electrolyte support and in the presence of 1M KMnO<sub>3</sub>(CN)<sub>6</sub> for Ti-TiO<sub>2</sub>-1h; (a) Ti-TiO<sub>2</sub>-2h; (c) Ti-TiO<sub>2</sub>-3h layers (e) and 4mM K<sub>3</sub>Fe(CN)<sub>6</sub> for (b) Ti-TiO<sub>2</sub>-1h; (d) Ti-TiO<sub>2</sub>-2h; (f) Ti-TiO<sub>2</sub>-3h layers.
